# Supplementary material
Source: PubMed Central journal article supplement (PMC4032189)
Supplement: jp502213y_si_001.pdf [file jp502213y_si_001.pdf]

# An Investigation of G-Quadruplex Structural Polymorphism in the Human Telomere Using a Combined Approach of Hydrodynamic Bead Modeling and Molecular Dynamics Simulation

*Huy T. Le<sup>1</sup>, William L. Dean<sup>1,2</sup>, Robert Buscaglia<sup>1</sup>, Jonathan B. Chaires<sup>1,2,3</sup>, and John O. Trent<sup>1,2,3\*</sup>*

<sup>1</sup>Department of Biochemistry and Molecular Biology, School of Medicine, University of Louisville, HSC-A Building, Room 616, Louisville, KY 40202,

<sup>2</sup>James Graham Brown Cancer Center, University of Louisville, 529 South Jackson Street, Louisville, KY 40202,

<sup>3</sup>Department of Medicine, School of Medicine, University of Louisville, 550 South Jackson Street, Louisville, KY 40202

***Supporting Information***

# Table of Content

|                                                                                                                            |     |
|----------------------------------------------------------------------------------------------------------------------------|-----|
| <b>Figure S1.</b> Per-atom atomic positional fluctuations of MD trajectories .....                                         | S4  |
| <b>Figure S2.</b> Per-residue atomic positional fluctuations of MD trajectories.....                                       | S5  |
| <b>Figure S3.</b> HYDROPRO parameters calibrated by global fitting of translational equivalent radii with AUC data .....   | S6  |
| <b>Table S1.</b> Comparisons of $s_{20,w}$ Calculated from MD Simulations and NMR Structures .....                         | S7  |
| <b>Figure S4.</b> Cartoon depictions of representative structures from cluster analysis of the 143D MD trajectory .....    | S8  |
| <b>Figure S5.</b> Cartoon depictions of representative structures from cluster analysis of the 1KF1 MD trajectory .....    | S8  |
| <b>Figure S6.</b> Cartoon depictions of representative structures from cluster analysis of the 2GKU MD trajectory .....    | S9  |
| <b>Figure S7.</b> Cartoon depictions of representative structures from cluster analysis of the 2HY9 MD trajectory .....    | S9  |
| <b>Figure S8.</b> Cartoon depictions of representative structures from cluster analysis of the 2JSM MD trajectory .....    | S10 |
| <b>Figure S9.</b> Cartoon depictions of representative structures from cluster analysis of the 2JPZ MD trajectory .....    | S10 |
| <b>Figure S10.</b> Cartoon depictions of representative structures from cluster analysis of the 2JSL MD trajectory .....   | S11 |
| <b>Figure S11.</b> Cartoon depictions of representative structures from cluster analysis of the 2KF8 MD trajectory .....   | S11 |
| <b>Figure S12.</b> Cartoon depictions of representative structures from cluster analysis of the 2KKA-G MD trajectory ..... | S12 |
| <b>Figure S13.</b> Cartoon depictions of representative structures from cluster analysis of the 2KKA-I MD trajectory ..... | S12 |
| <b>Figure S14.</b> Porcupine plots of the second eigenvectors for MD trajectories.....                                     | S13 |
| <b>Figure S15.</b> Porcupine plots of the third eigenvectors for MD trajectories .....                                     | S14 |
| <b>Figure S16.</b> The first ten eigenvalues from principal component analysis of MD trajectories .....                    | S15 |
| <b>Figure S17.</b> The percent of total variance explained by the first ten eigenvalues .....                              | S16 |

|                                                                                                                                |     |
|--------------------------------------------------------------------------------------------------------------------------------|-----|
| <b>Figure S18.</b> The second principal component as a function of the first principal component for 143D MD trajectory.....   | S17 |
| <b>Figure S19.</b> The second principal component as a function of the first principal component for 1KF1 MD trajectory.....   | S17 |
| <b>Figure S20.</b> The second principal component as a function of the first principal component for 2GKU MD trajectory.....   | S18 |
| <b>Figure S21.</b> The second principal component as a function of the first principal component for 2HY9 MD trajectory.....   | S18 |
| <b>Figure S22.</b> The second principal component as a function of the first principal component for 2JSM MD trajectory.....   | S19 |
| <b>Figure S23.</b> The second principal component as a function of the first principal component for 2JPZ MD trajectory.....   | S19 |
| <b>Figure S24.</b> The second principal component as a function of the first principal component for 2JSL MD trajectory.....   | S20 |
| <b>Figure S25.</b> The second principal component as a function of the first principal component for 2KF8 MD trajectory.....   | S20 |
| <b>Figure S26.</b> The second principal component as a function of the first principal component for 2KKA-G MD trajectory..... | S21 |
| <b>Figure S27.</b> The second principal component as a function of the first principal component for 2KKA-I MD trajectory..... | S21 |
| <b>Figure S28.</b> Pseudo-density grid maps of water oxygen atoms at 2× bulk density .....                                     | S22 |
| <b>Figure S29.</b> Pseudo-density grid maps of cations at reference density.....                                               | S23 |

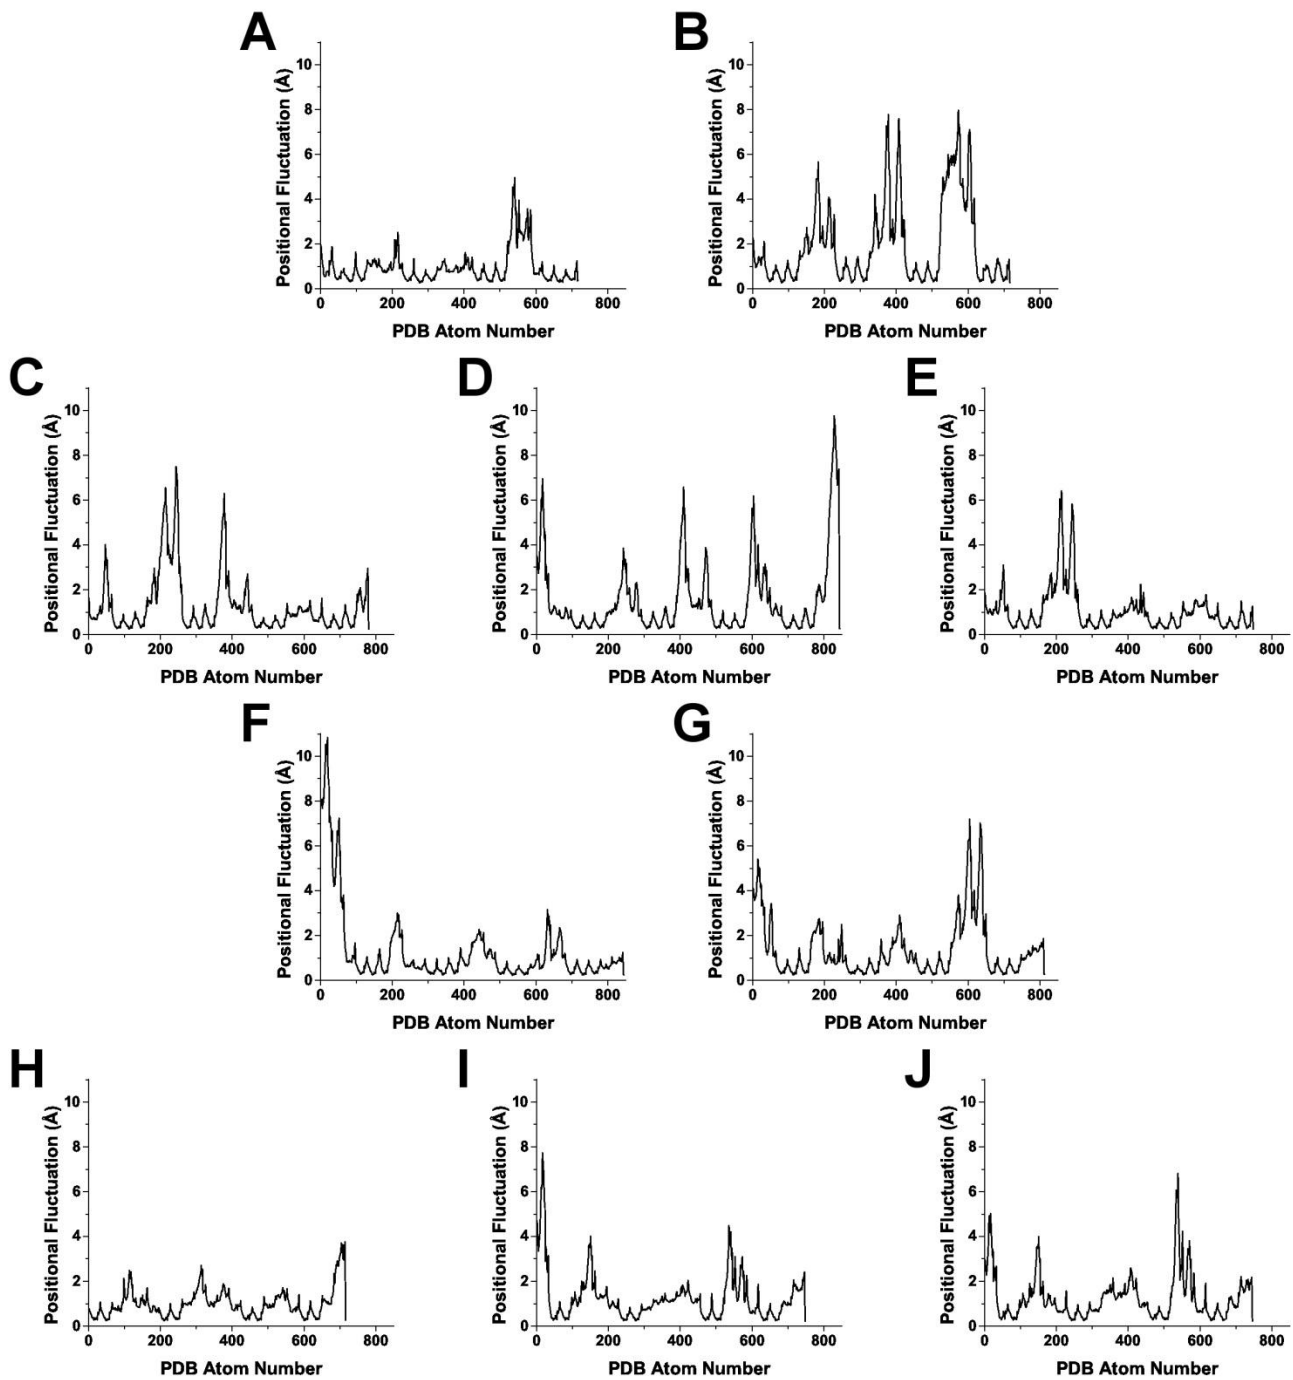

**Figure S1. Per-atom atomic positional fluctuations over 10,000 frames for 143D (A), 1KF1 (B), 2GKU (C), 2HY9 (D), 2JSM (E), 2JPZ (F), 2JSL (G), 2KF8 (H), 2KKA-G (I), and 2KKA-I (J).**

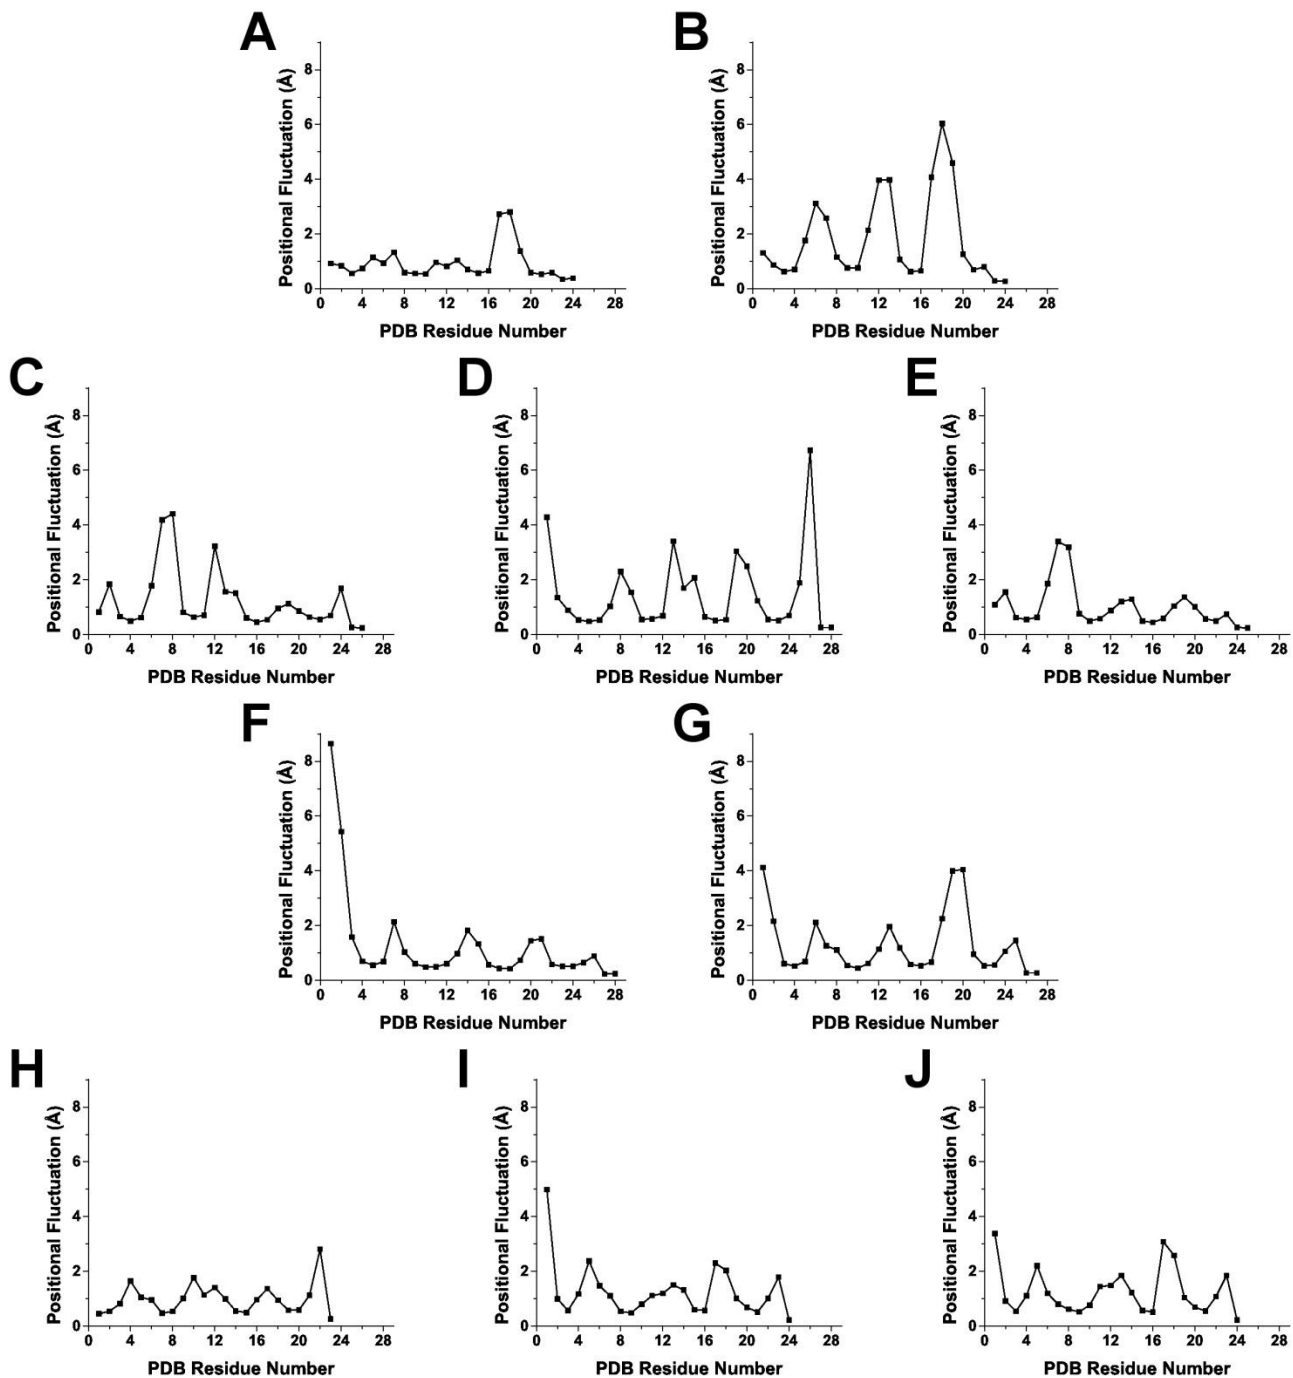

**Figure S2. Per-residue atomic positional fluctuations over 10,000 frames for 143D (A), 1KF1 (B), 2GKU (C), 2HY9 (D), 2JSM (E), 2JPZ (F), 2JSL (G), 2KF8 (H), 2KKA-G (I), and 2KKA-I (J).**

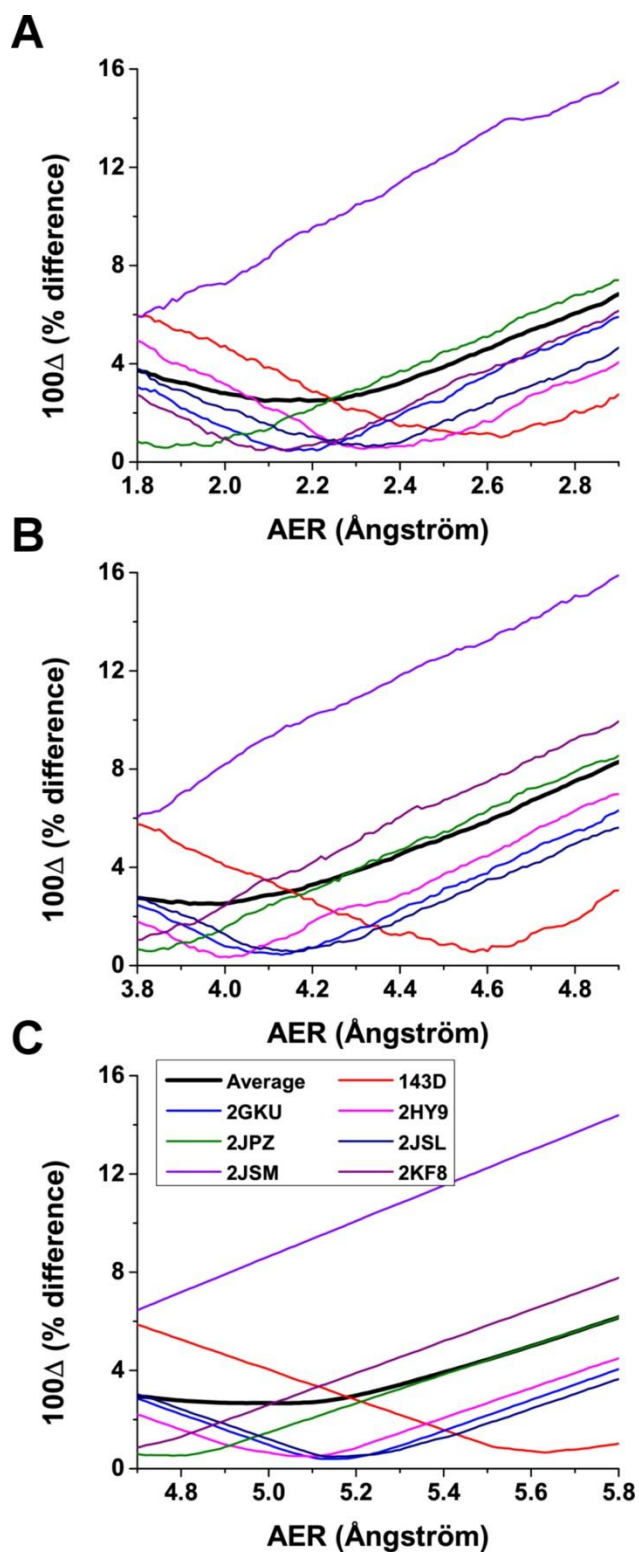

**Figure S3. HYDROPRO parameters calibrated by global fitting of translational equivalent radii with AUC data.** Translational equivalent radius is also known as the Stokes radius. The values for  $100\Delta X$  and  $100\Delta$  as a function of the atomic element radius (AER) for the primary hydrodynamic model as calculated using the seven G-quadruplex structures formed from the human telomere sequence. Hydrodynamic properties of G-quadruplexes were calculated using the atomic-level hydrodynamic shell-model calculation (A), residue-level shell-model calculation (B), and residue-level bead-model calculation (C).

**Table S1. Comparisons of  $s_{20,W}$  Calculated from MD Simulations and NMR Structures**

| <b>Structure</b>                    | <b>% Diff. Atom/shell</b> | <b>%Diff. Residue/shell</b> | <b>%Diff. Residue/bead</b> |
|-------------------------------------|---------------------------|-----------------------------|----------------------------|
| <b>143D</b>                         | 3.05 %                    | 0.06 %                      | 0.34 %                     |
| <b>2GKU</b>                         | 0.32 %                    | 1.87 %                      | 2.03 %                     |
| <b>2HY9</b>                         | 5.30 %                    | 3.04 %                      | 3.38 %                     |
| <b>2JPZ</b>                         | 1.17 %                    | 0.31 %                      | 0.28 %                     |
| <b>2JSL</b>                         | 0.09 %                    | 0.98 %                      | 0.71 %                     |
| <b>2JSM</b>                         | 1.35 %                    | 3.61 %                      | 3.11 %                     |
| <b>2KF8</b>                         | 2.44 %                    | 2.64 %                      | 2.69 %                     |
| <b>Weighted Average<sup>1</sup></b> | 1.85 %                    | 1.89 %                      | 1.88 %                     |

<sup>1</sup>Average weighted by number of poses deposited in PDB Database (143D – 6 poses, 2GKU – 12 poses, 2HY9 – 10 poses, 2JPZ – 10 poses, 2JSL – 10 poses, 2JSM – 10 poses, 2KF8 – 10 poses)

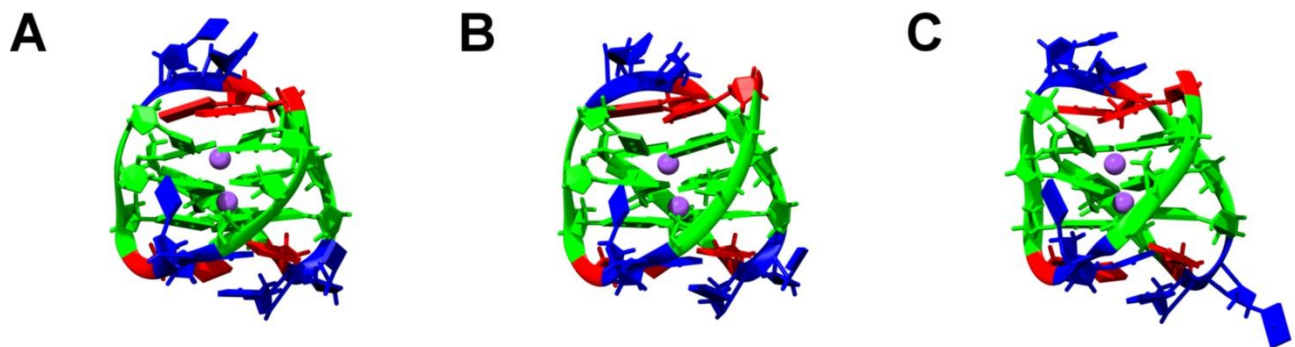

**Figure S4. Cartoon depictions of representative structures from cluster analysis of the 143D MD trajectory.** The clusters are shown from the most populated cluster to the least populated cluster. Nucleotides are colored according to NDB formats: guanine is green, adenine is red, and thymine is blue. Sodium ions are colored purple.

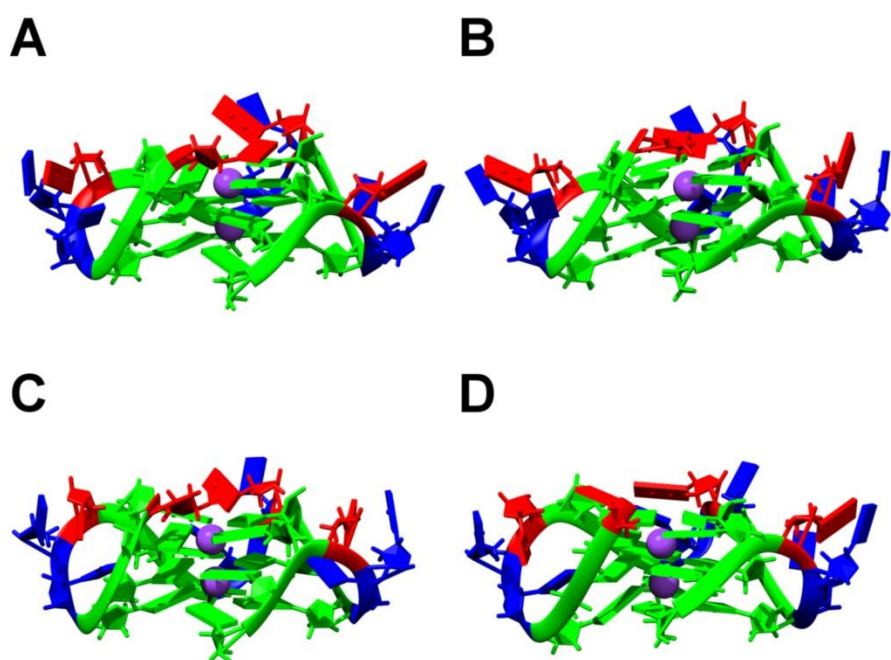

**Figure S5. Cartoon depictions of representative structures from cluster analysis of the 1KF1 MD trajectory.** The clusters are shown from the most populated cluster to the least populated cluster. Nucleotides are colored according to NDB formats: guanine is green, adenine is red, and thymine is blue. Potassium ions are colored purple.



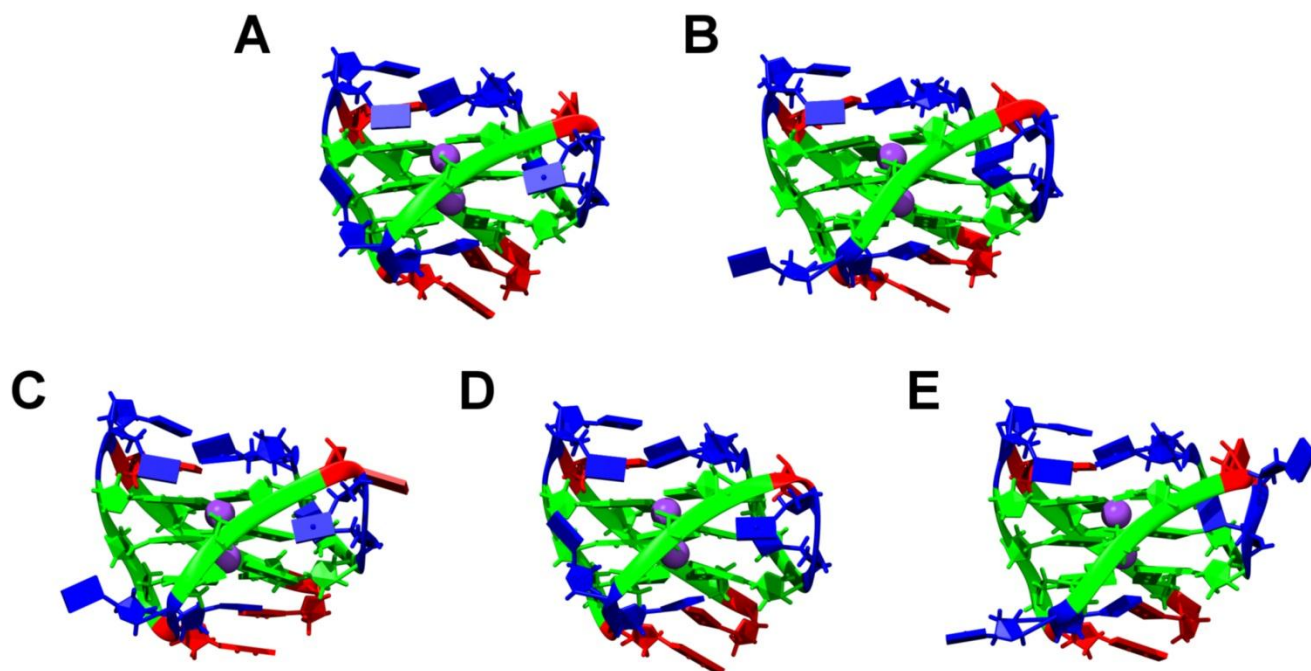

**Figure S6. Cartoon depictions of representative structures from cluster analysis of the 2GKU MD trajectory.** The clusters are shown from the most populated cluster to the least populated cluster. Nucleotides are colored according to NDB formats: guanine is green, adenine is red, and thymine is blue. Potassium ions are colored purple.

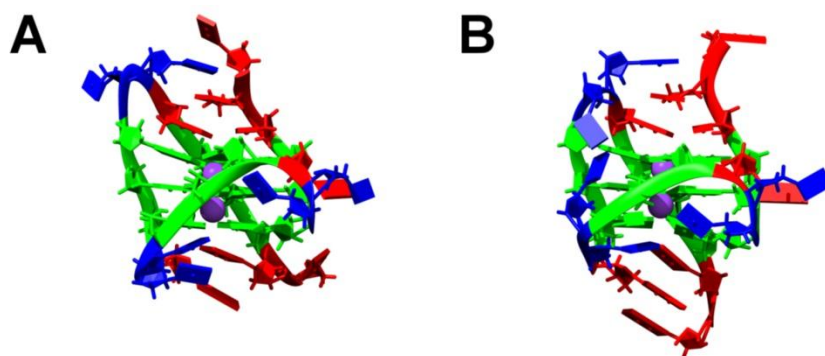

**Figure S7. Cartoon depictions of representative structures from cluster analysis of the 2HY9 MD trajectory.** The clusters are shown from the most populated cluster to the least populated cluster. Nucleotides are colored according to NDB formats: guanine is green, adenine is red, and thymine is blue. Potassium ions are colored purple.

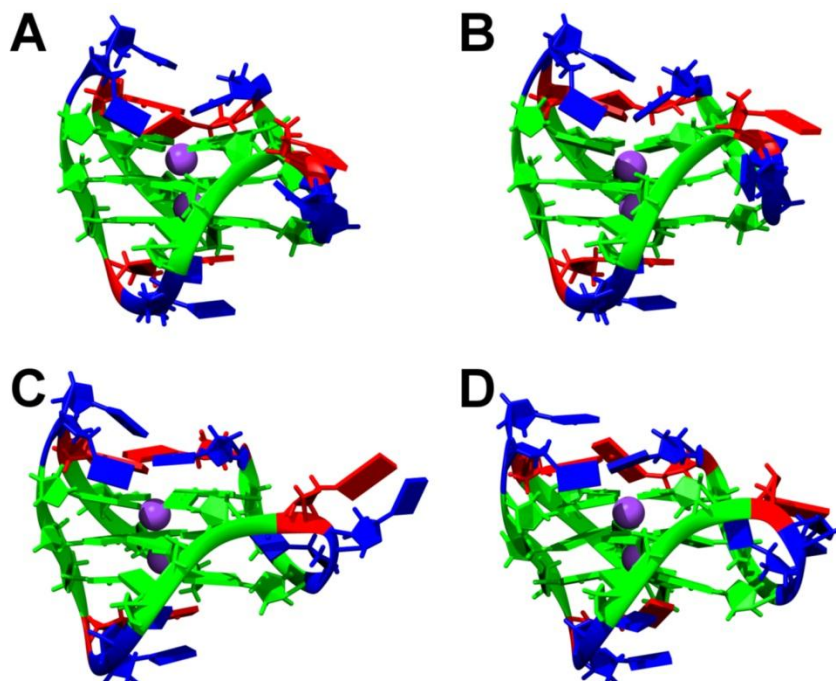

**Figure S8. Cartoon depictions of representative structures from cluster analysis of the 2JSM MD trajectory.** The clusters are shown from the most populated cluster to the least populated cluster. Nucleotides are colored according to NDB formats: guanine is green, adenine is red, and thymine is blue. Potassium ions are colored purple.

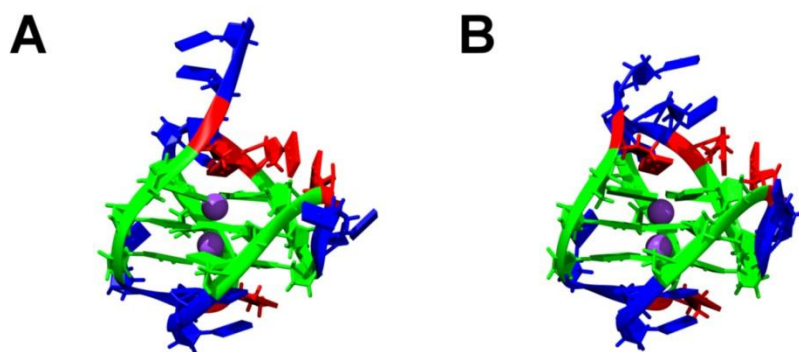

**Figure S9. Cartoon depictions of representative structures from cluster analysis of the 2JPZ MD trajectory.** The clusters are shown from the most populated cluster to the least populated cluster. Nucleotides are colored according to NDB formats: guanine is green, adenine is red, and thymine is blue. Potassium ions are colored purple.

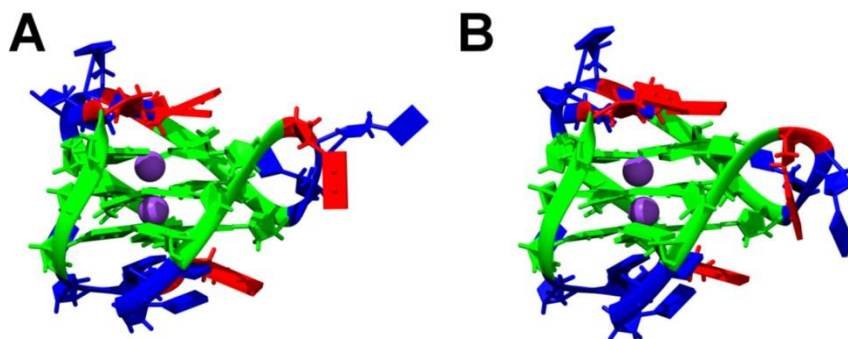

**Figure S10. Cartoon depictions of representative structures from cluster analysis of the 2JSL MD trajectory.** The clusters are shown from the most populated cluster to the least populated cluster. Nucleotides are colored according to NDB formats: guanine is green, adenine is red, and thymine is blue. Potassium ions are colored purple.

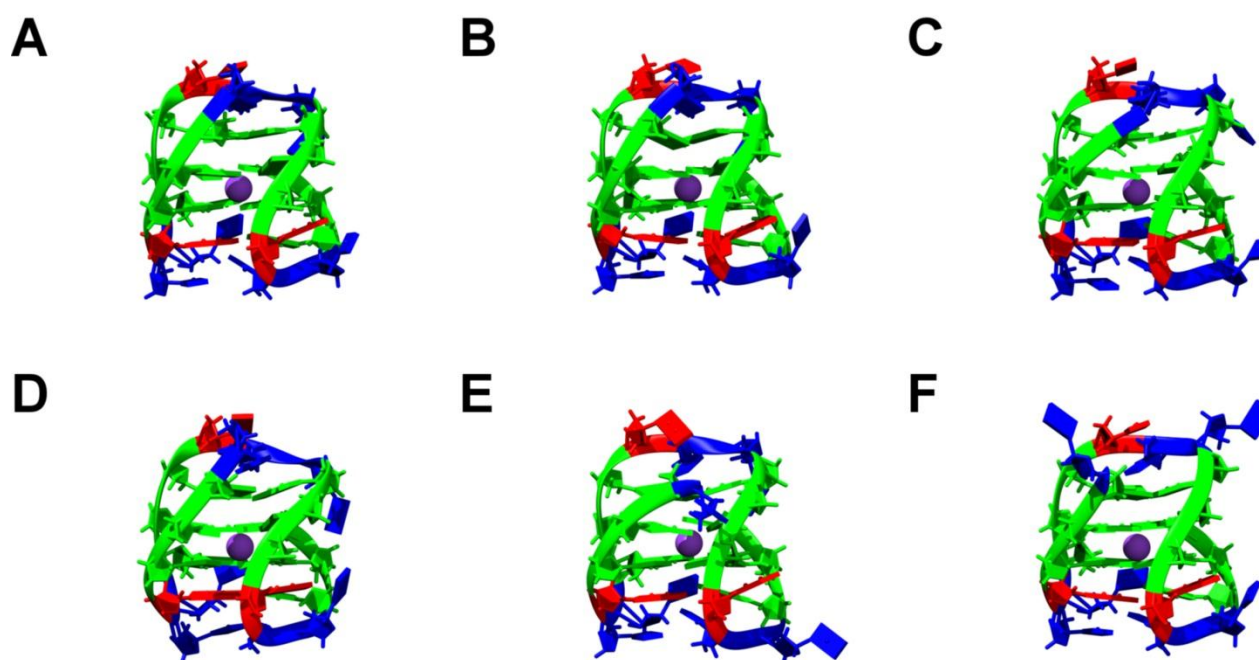

**Figure S11. Cartoon depictions of representative structures from cluster analysis of the 2KF8 MD trajectory.** The clusters are shown from the most populated cluster to the least populated cluster. Nucleotides are colored according to NDB formats: guanine is green, adenine is red, and thymine is blue. Potassium ions are colored purple.

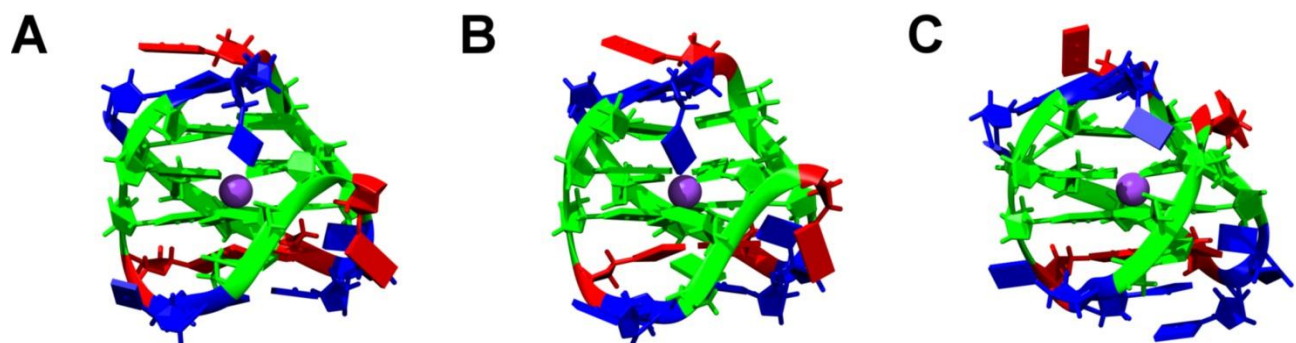

**Figure S12. Cartoon depictions of representative structures from cluster analysis of the 2KKA-G MD trajectory.** The clusters are shown from the most populated cluster to the least populated cluster. Nucleotides are colored according to NDB formats: guanine is green, adenine is red, and thymine is blue. Potassium ions are colored purple.

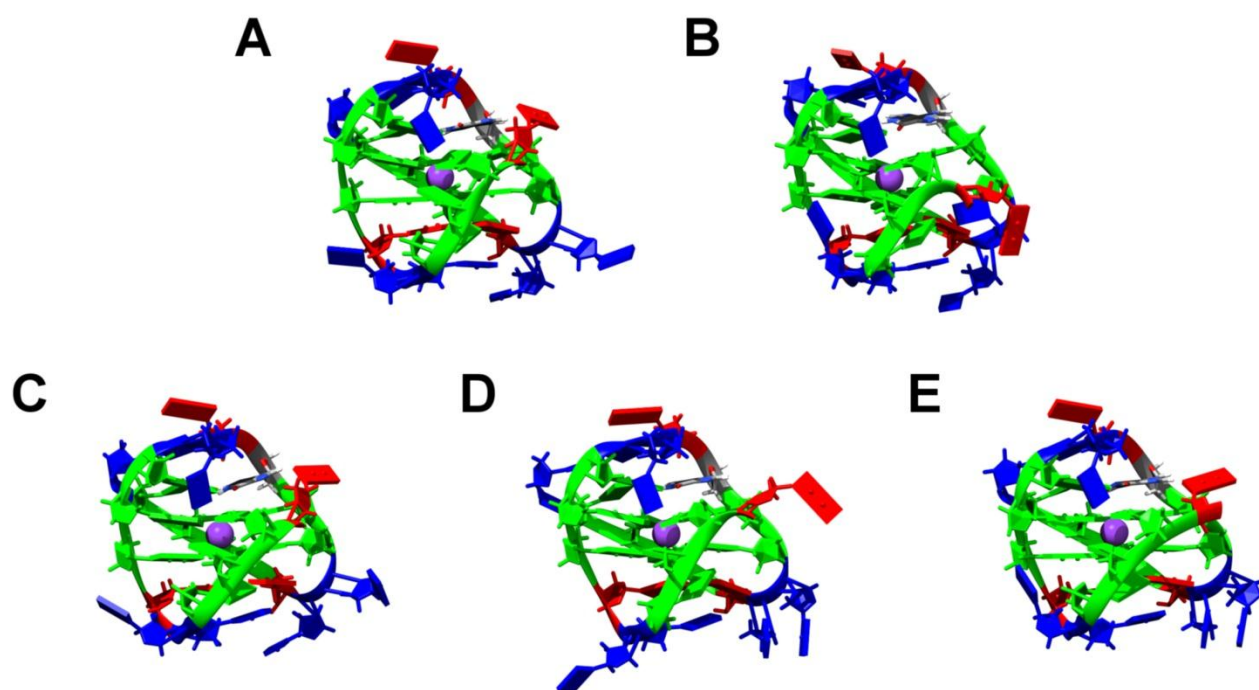

**Figure S13. Cartoon depictions of representative structures from cluster analysis of the 2KKA-I MD trajectory.** The clusters are shown from the most populated cluster to the least populated cluster. Nucleotides are colored according to NDB formats: guanine is green, adenine is red, and thymine is blue. Potassium ions are colored purple.

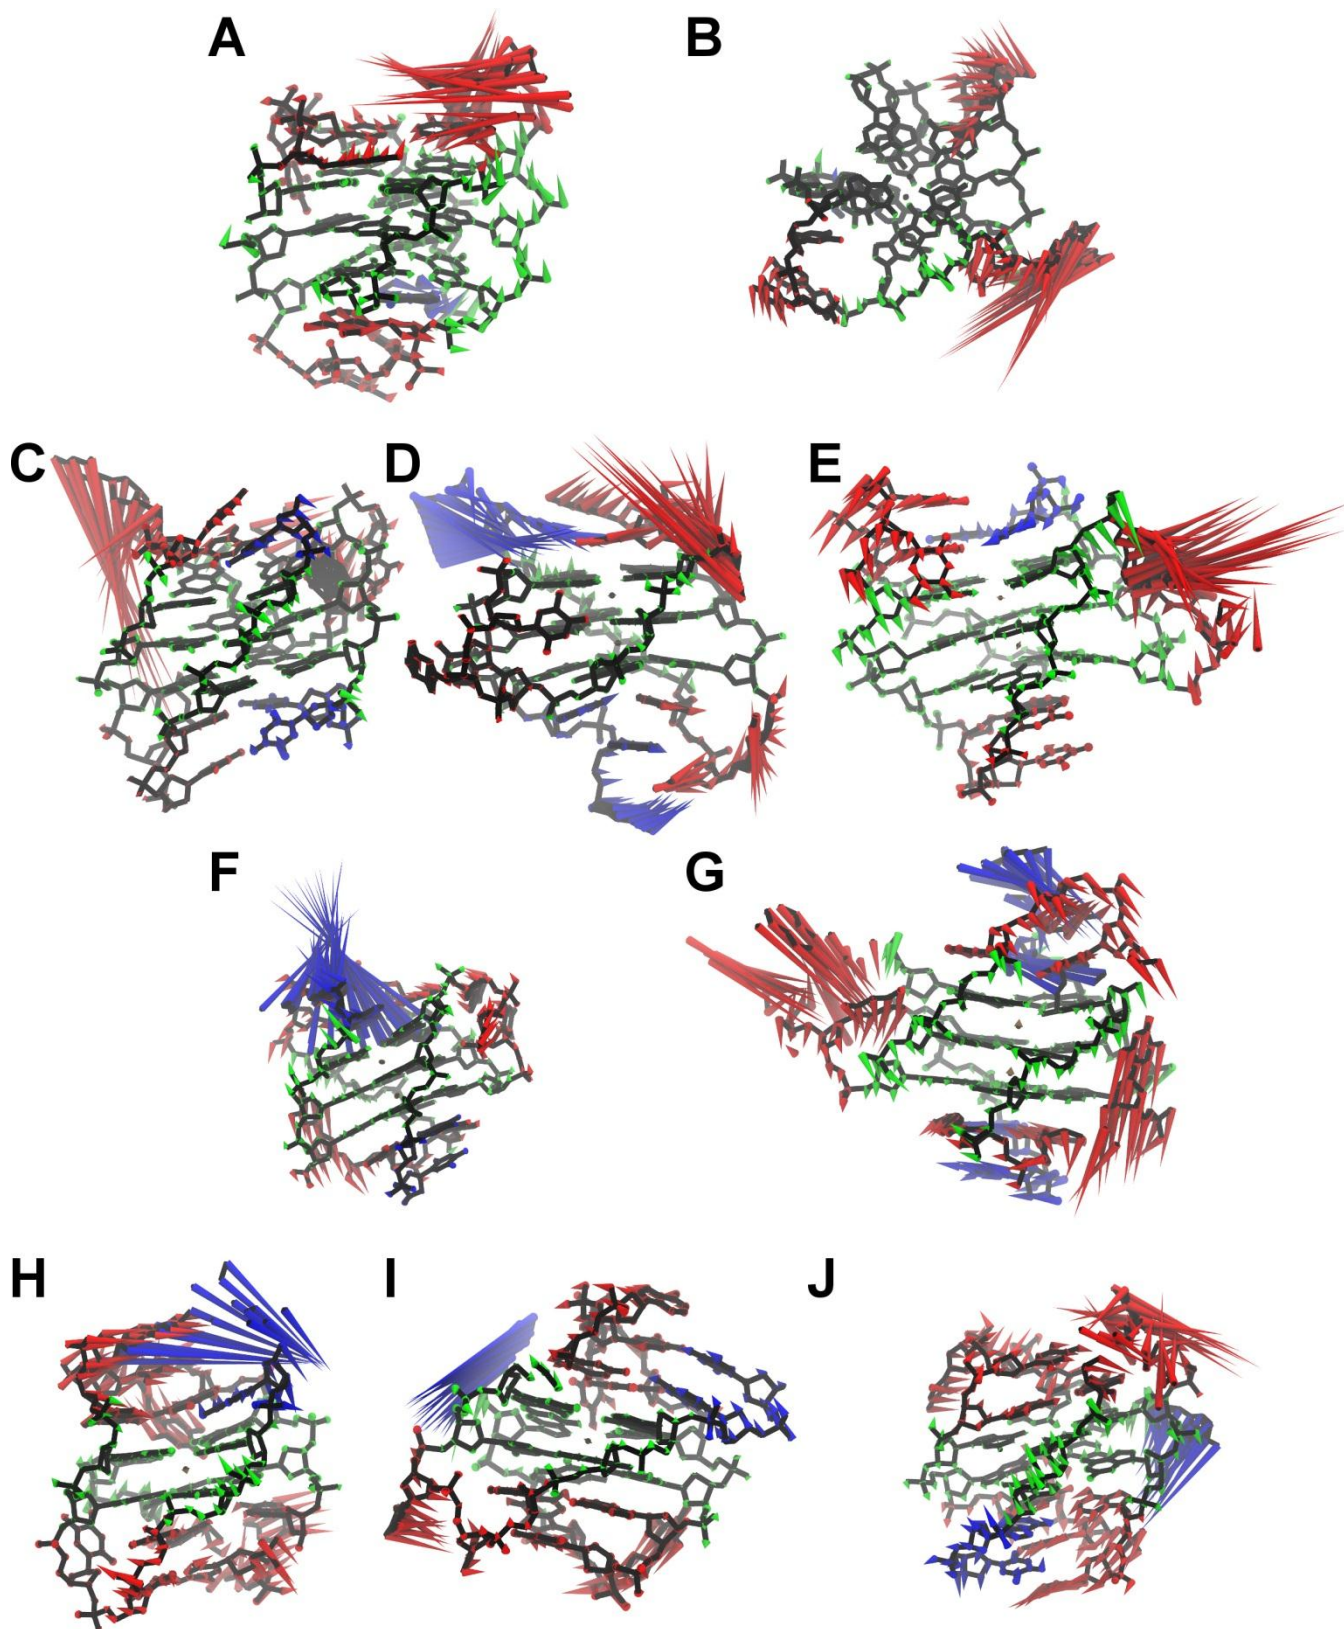

**Figure S14.** Porcupine plots of the second eigenvectors for 143D (A), 1KF1 (B), 2GKU (C), 2HY9 (D), 2JSM (E), 2JPZ (F), 2JSL (G), 2KF8 (H), 2KKA-G (I), and 2KKA-I(J). Motions associated with stem residues are colored green, loop residues are red, flanking residues are blue, and central ions are yellow.

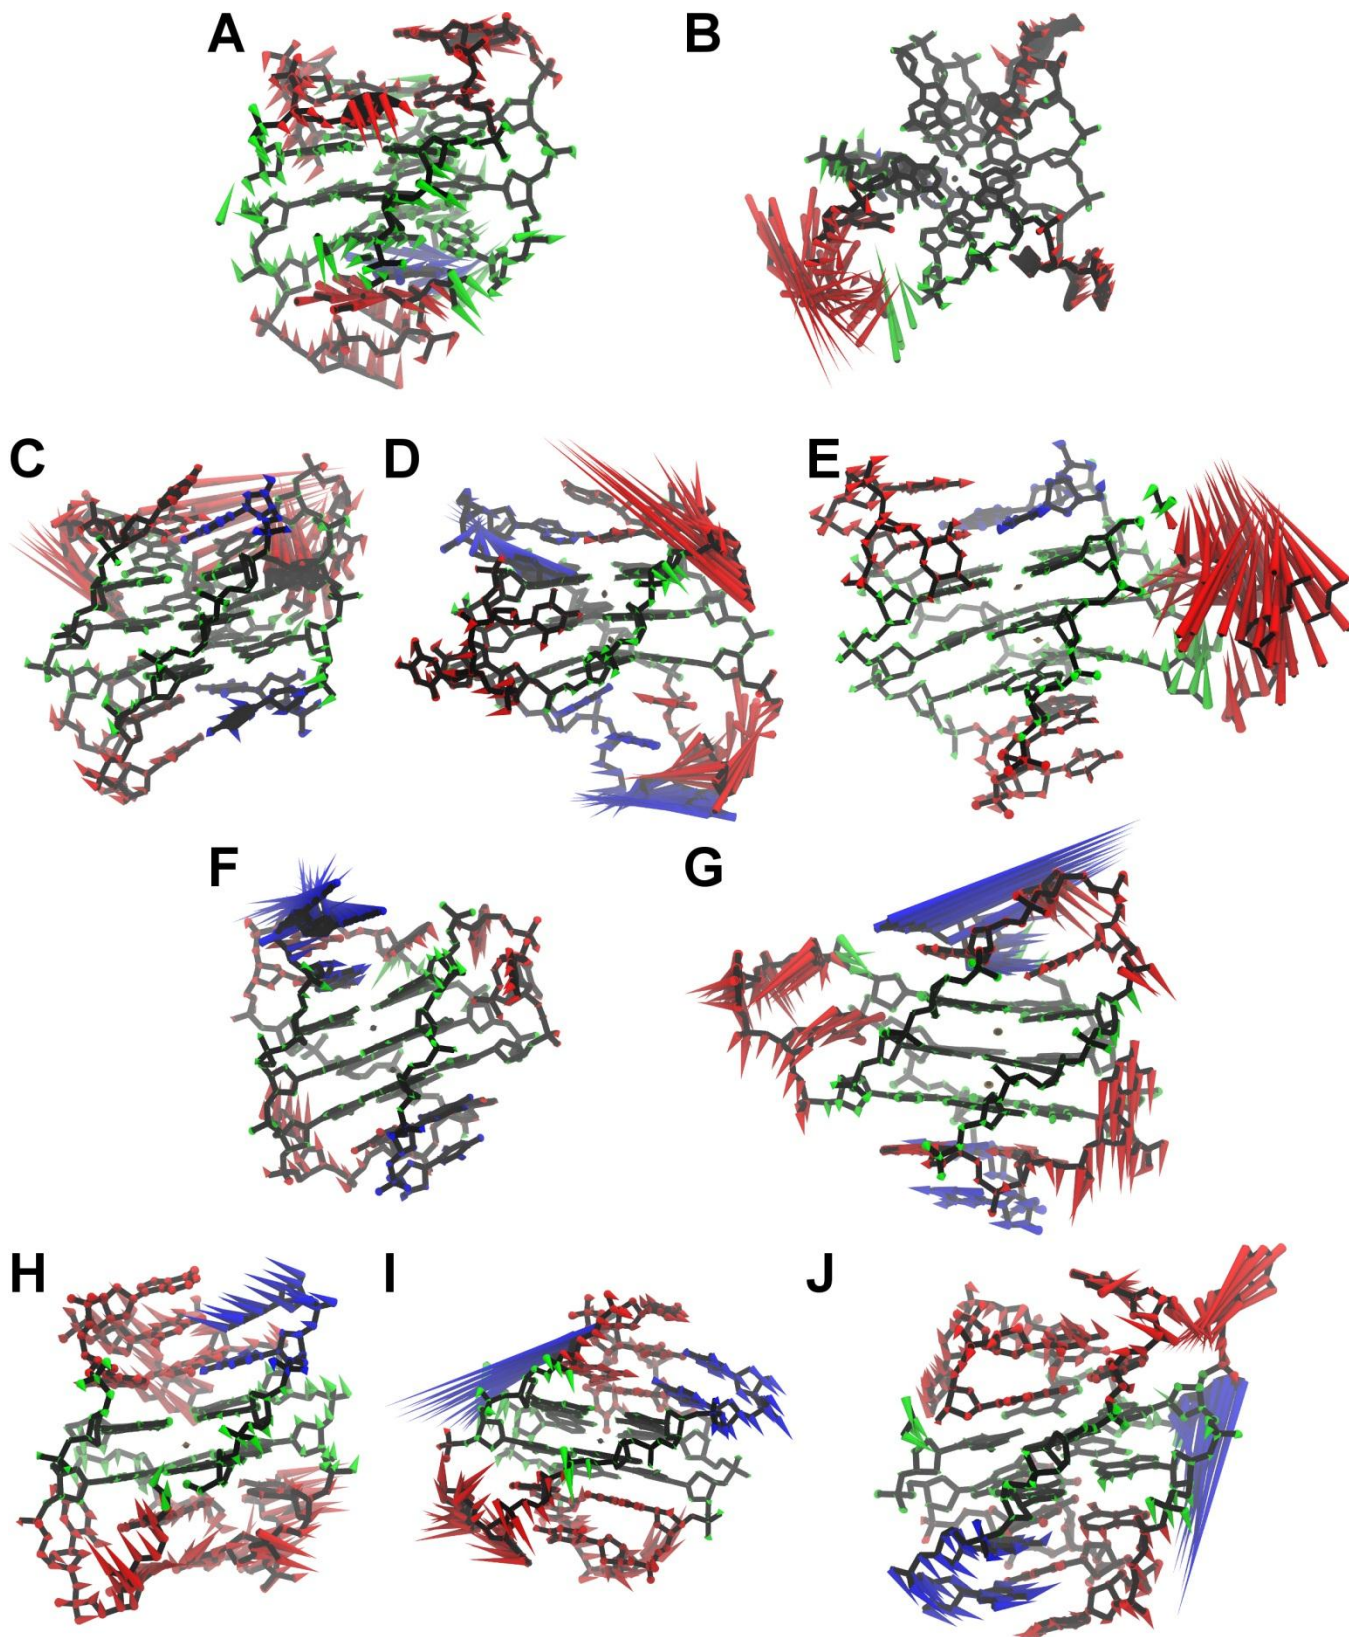

**Figure S15.** Porcupine plots of the third eigenvectors for 143D (A), 1KF1 (B), 2GKU (C), 2HY9 (D), 2JSM (E), 2JPZ (F), 2JSL (G), 2KF8 (H), 2KKA-G (I), and 2KKA-I(J). Motions associated with stem residues are colored green, loop residues are red, flanking residues are blue, and central ions are yellow.

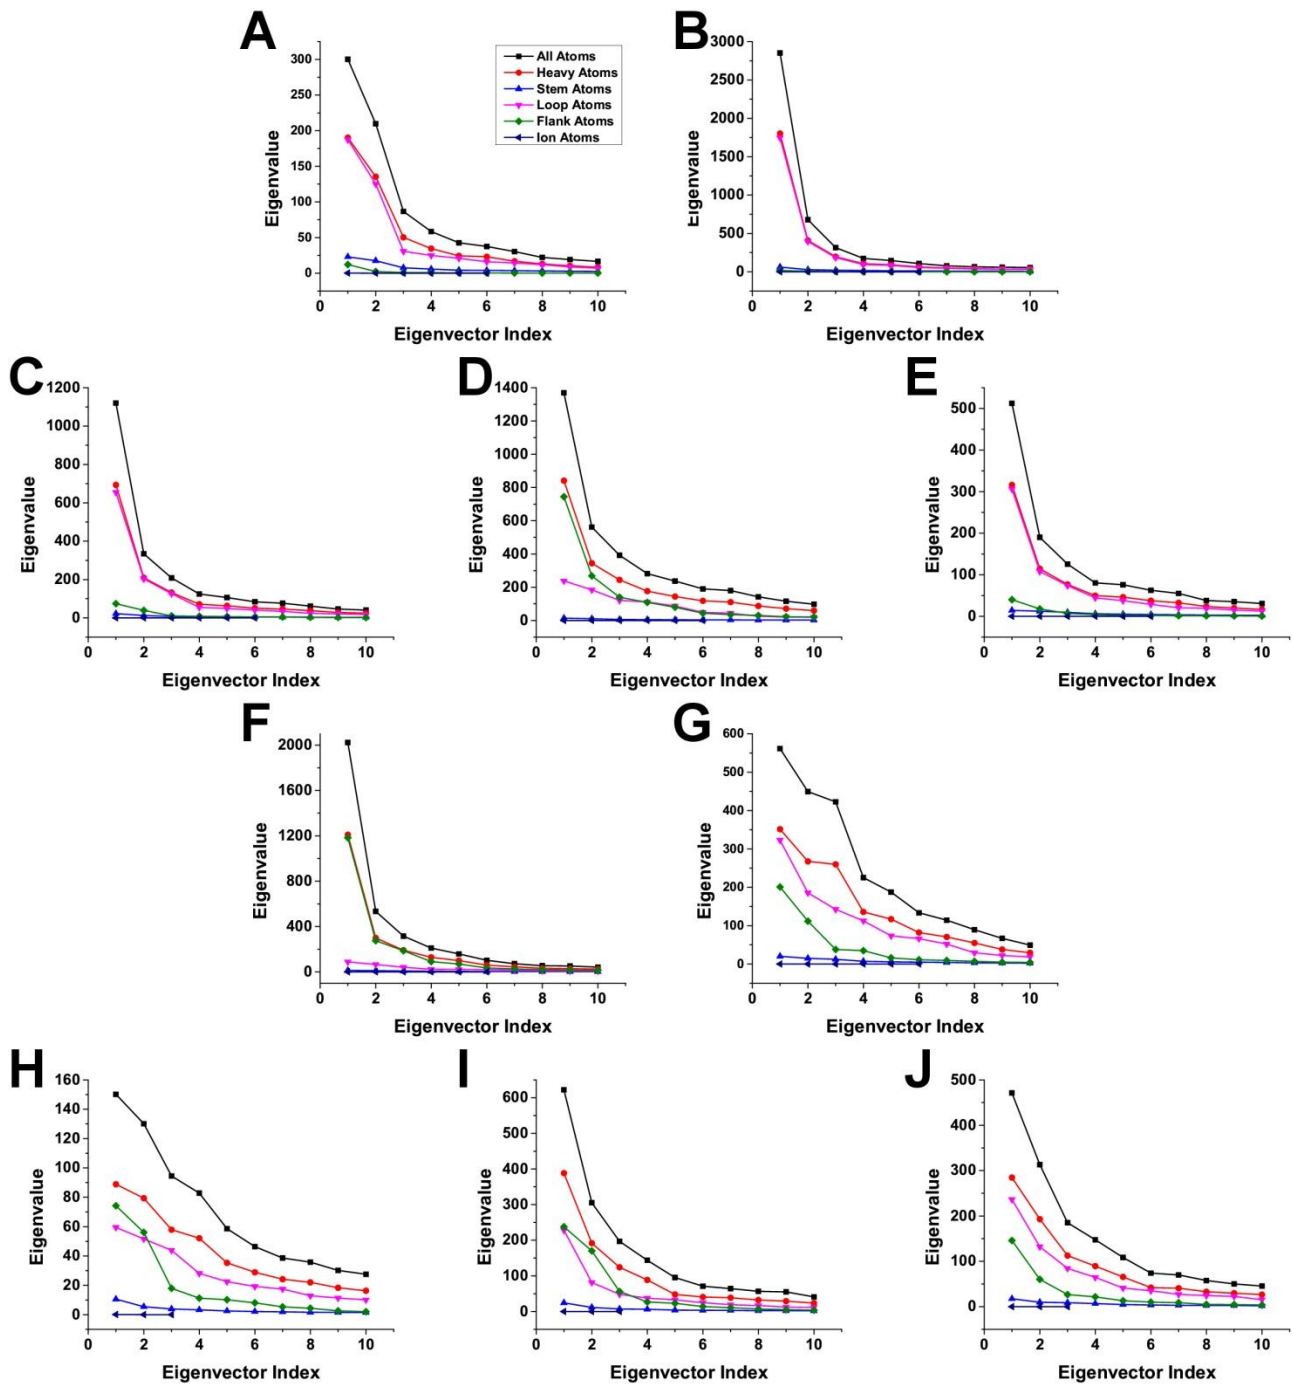

**Figure S16.** The first ten eigenvalues for 143D (A), 1KF1 (B), 2GKU (C), 2HY9 (D), 2JSM (E), 2JPZ (F), 2JSL (G), 2KF8 (H), 2KKA-G (I), and 2KKA-I(J).

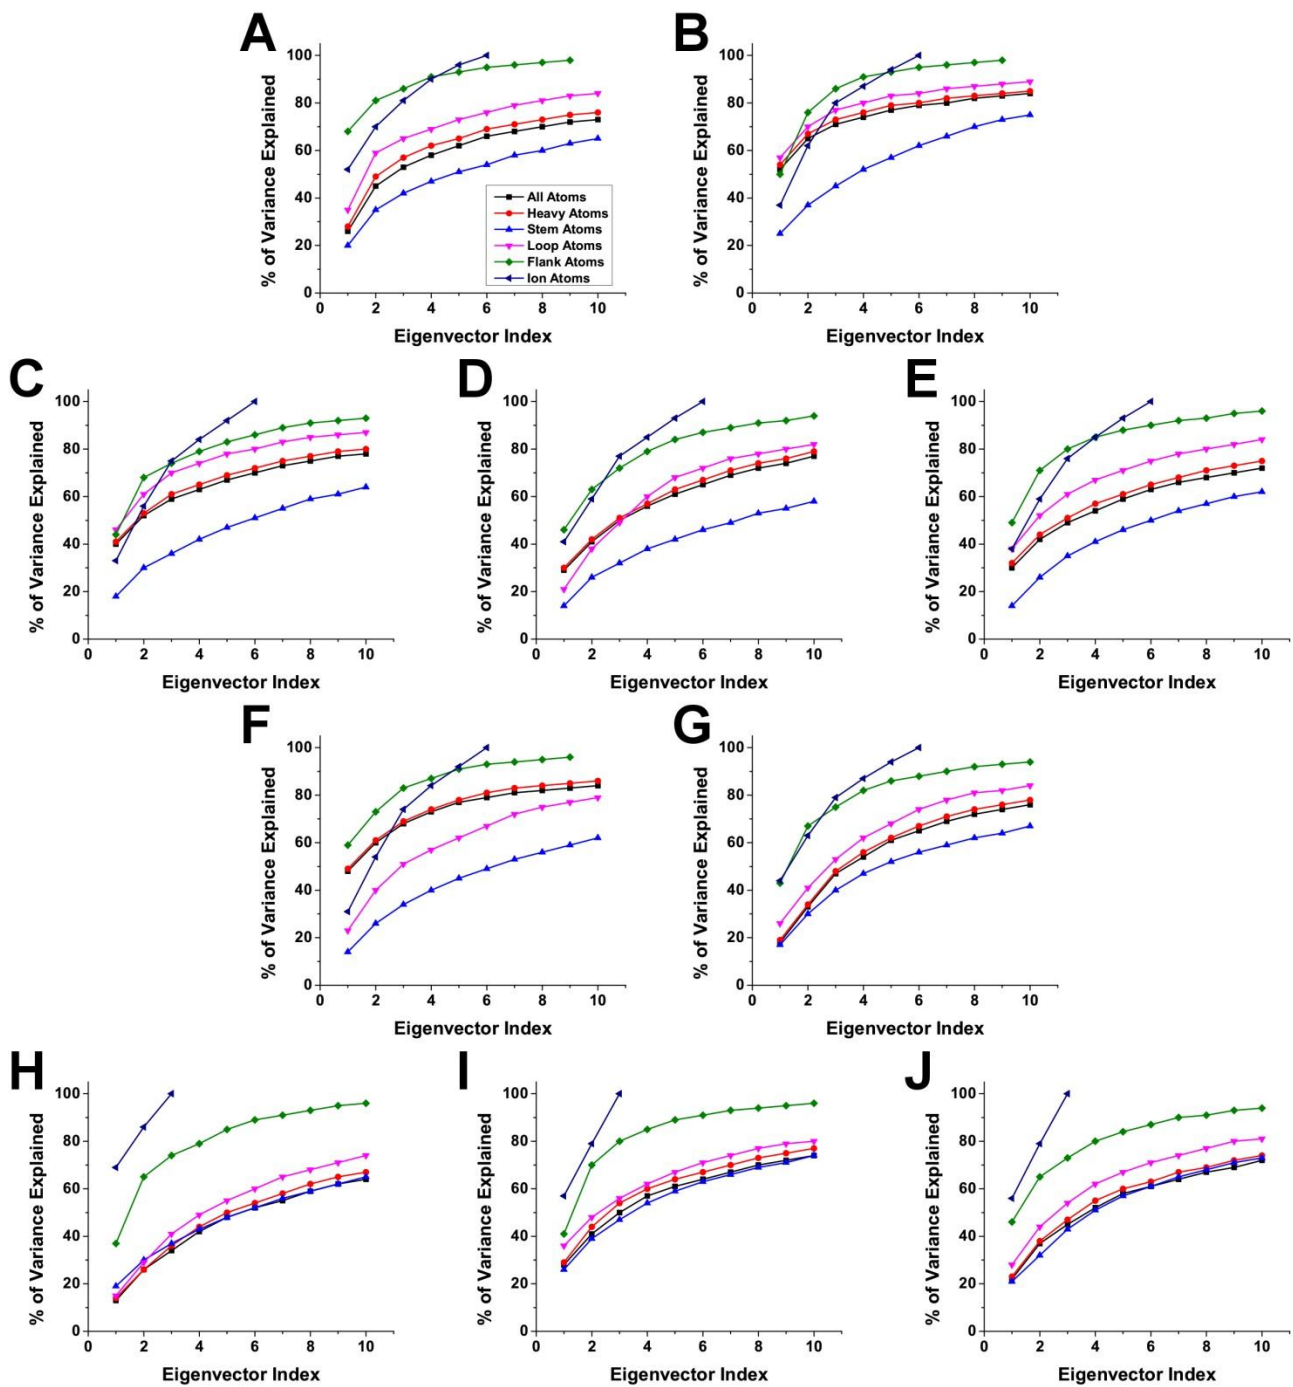

**Figure S17.** The percent of total variance explained by principal component analysis for 143D (A), 1KF1 (B), 2GKU (C), 2HY9 (D), 2JSM (E), 2JPZ (F), 2JSL (G), 2KF8 (H), 2KKA-G (I), and 2KKA-I(J).



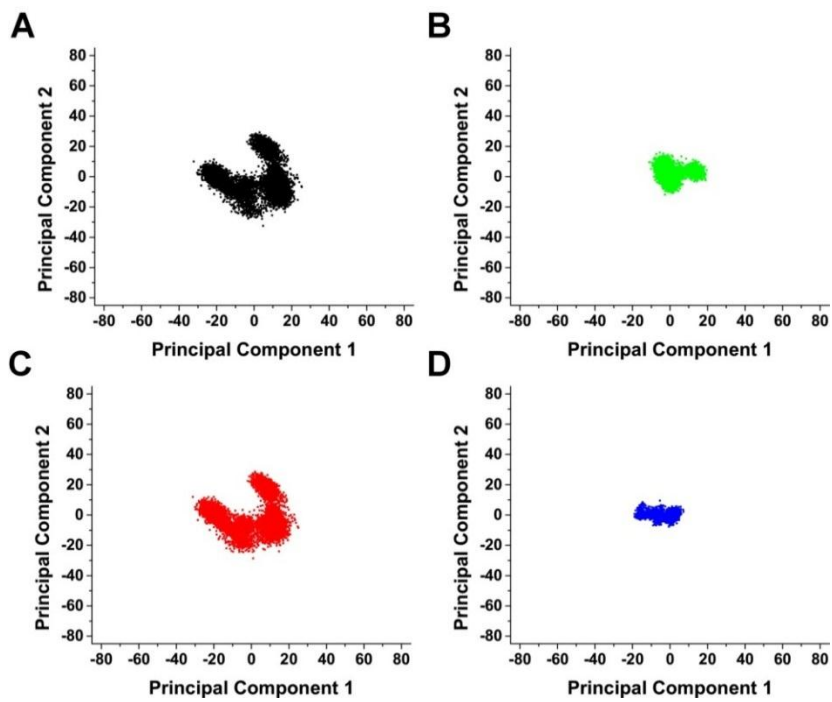

**Figure S18. The second principal component as a function of the first principal component for 143D MD trajectory.** Principal components are plotted for all non-hydrogen atoms (A), non-hydrogen G-tetrad stem atoms (B), non-hydrogen loop atoms (C), and non-hydrogen flanking bases atoms (D). For the 143D MD trajectory, dynamic motions of loop atoms have a dominant effect on the overall dynamic motions of the G-quadruplex structures.

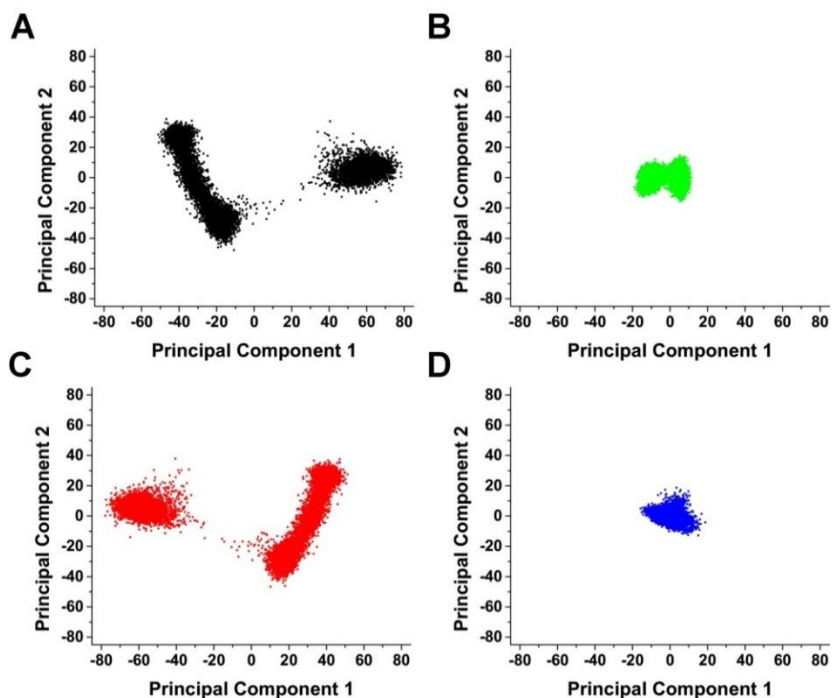

**Figure S19. The second principal component as a function of the first principal component for 1KF1 MD trajectory.** Principal components are plotted for all non-hydrogen atoms (A), non-hydrogen G-tetrad stem atoms (B), non-hydrogen loop atoms (C), and non-hydrogen flanking bases atoms (D). For the 1KF1 MD trajectory, dynamic motions of loop atoms have a dominant effect on the overall dynamic motions of the G-quadruplex structures.

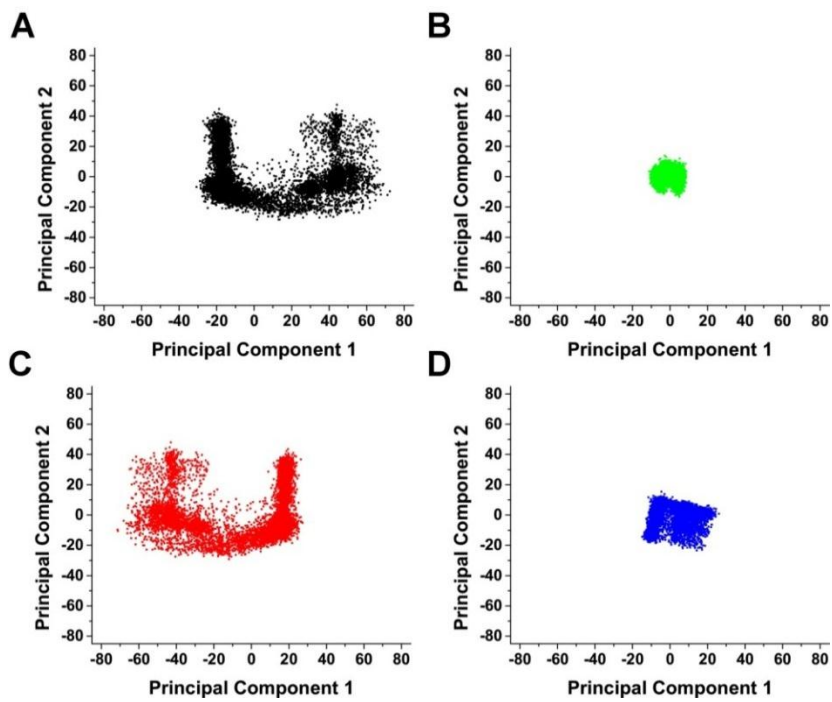

**Figure S20. The second principal component as a function of the first principal component for 2GKU MD trajectory.** Principal components are plotted for all non-hydrogen atoms (A), non-hydrogen G-tetrad stem atoms (B), non-hydrogen loop atoms (C), and non-hydrogen flanking bases atoms (D). For the 2GKU MD trajectory, dynamic motions of loop atoms have a dominant effect on the overall dynamic motions of the G-quadruplex structures.

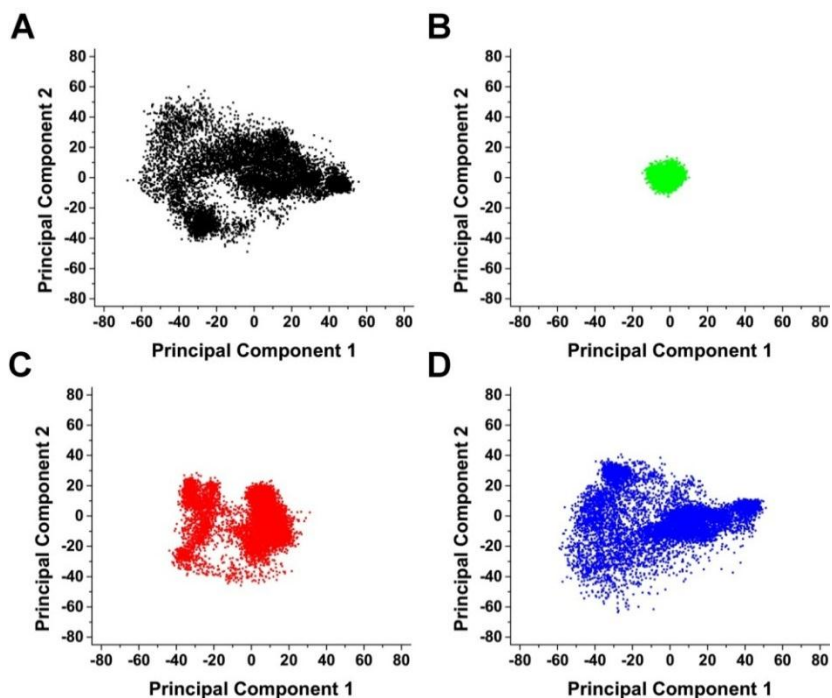

**Figure S21. The second principal component as a function of the first principal component for 2HY9 MD trajectory.** Principal components are plotted for all non-hydrogen atoms (A), non-hydrogen G-tetrad stem atoms (B), non-hydrogen loop atoms (C), and non-hydrogen flanking bases atoms (D). For the 2HY9 MD trajectory, dynamic motions of flanking atoms have a dominant effect on the overall dynamic motions of the G-quadruplex structures with only small contributions from loop atoms.

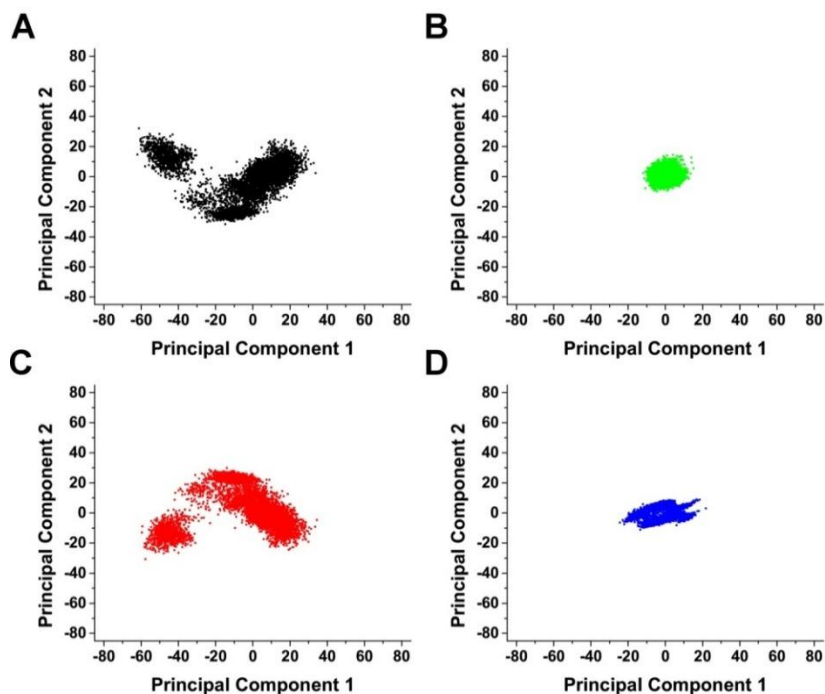

**Figure S22. The second principal component as a function of the first principal component for 2JSM MD trajectory.** Principal components are plotted for all non-hydrogen atoms (A), non-hydrogen G-tetrad stem atoms (B), non-hydrogen loop atoms (C), and non-hydrogen flanking bases atoms (D). For the 2JSM MD trajectory, dynamic motions of loop atoms have a dominant effect on the overall dynamic motions of the G-quadruplex structures.

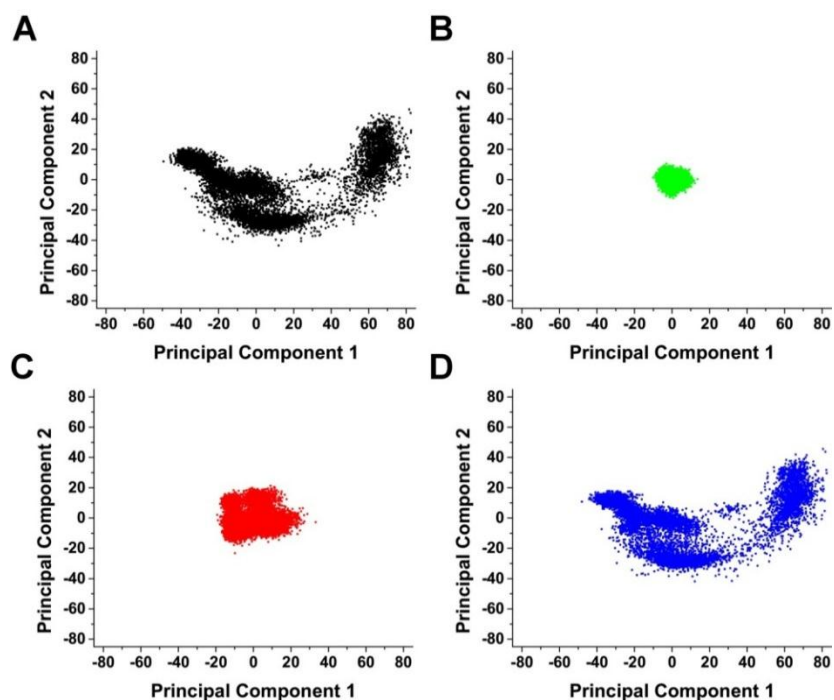

**Figure S23. The second principal component as a function of the first principal component for 2JPZ MD trajectory.** Principal components are plotted for all non-hydrogen atoms (A), non-hydrogen G-tetrad stem atoms (B), non-hydrogen loop atoms (C), and non-hydrogen flanking bases atoms (D). For the 2JPZ MD trajectory, dynamic motions of flanking atoms have a dominant effect on the overall dynamic motions of the G-quadruplex structures.

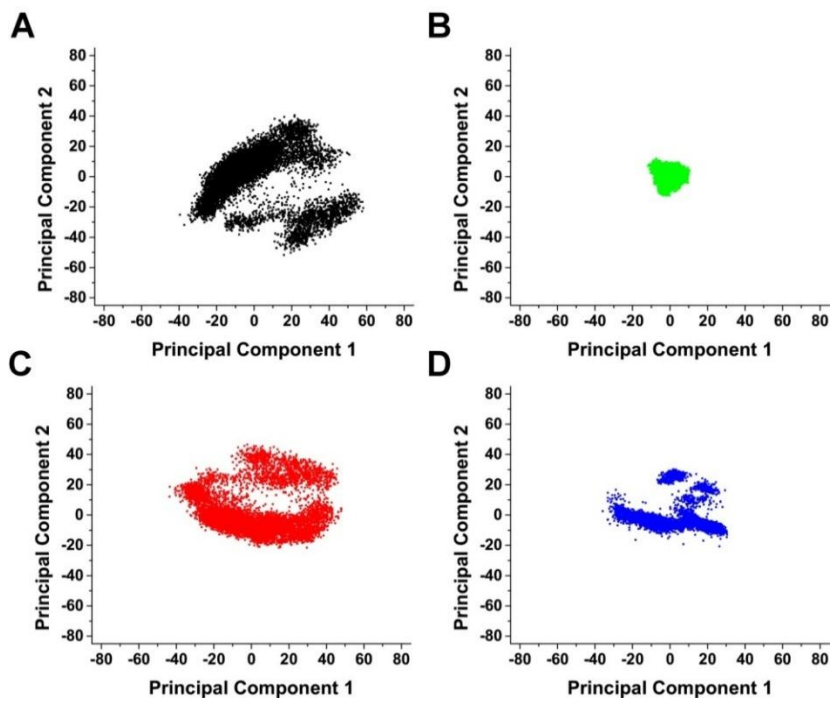

**Figure S24. The second principal component as a function of the first principal component for 2JSL MD trajectory.** Principal components are plotted for all non-hydrogen atoms (A), non-hydrogen G-tetrad stem atoms (B), non-hydrogen loop atoms (C), and non-hydrogen flanking bases atoms (D). For the 2JSL MD trajectory, dynamic motions of both loop and flanking atoms were observed to influence the overall dynamic motions of the G-quadruplex structures.

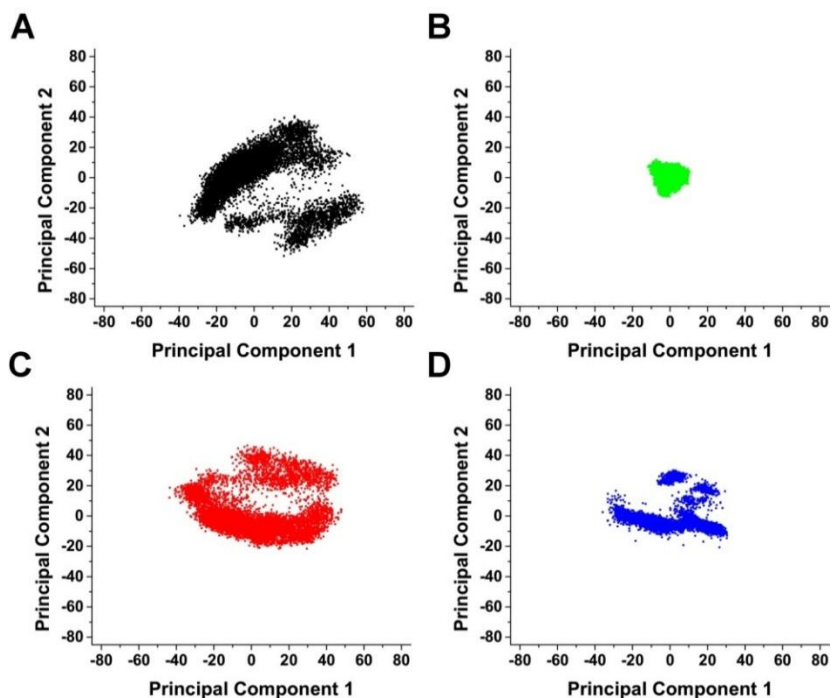

**Figure S25. The second principal component as a function of the first principal component for 2KF8 MD trajectory.** Principal components are plotted for all non-hydrogen atoms (A), non-hydrogen G-tetrad stem atoms (B), non-hydrogen loop atoms (C), and non-hydrogen flanking bases atoms (D). For the 2KF8 MD trajectory, dynamic motions of both loop and flanking atoms were observed to influence the overall dynamic motions of the G-quadruplex structures.

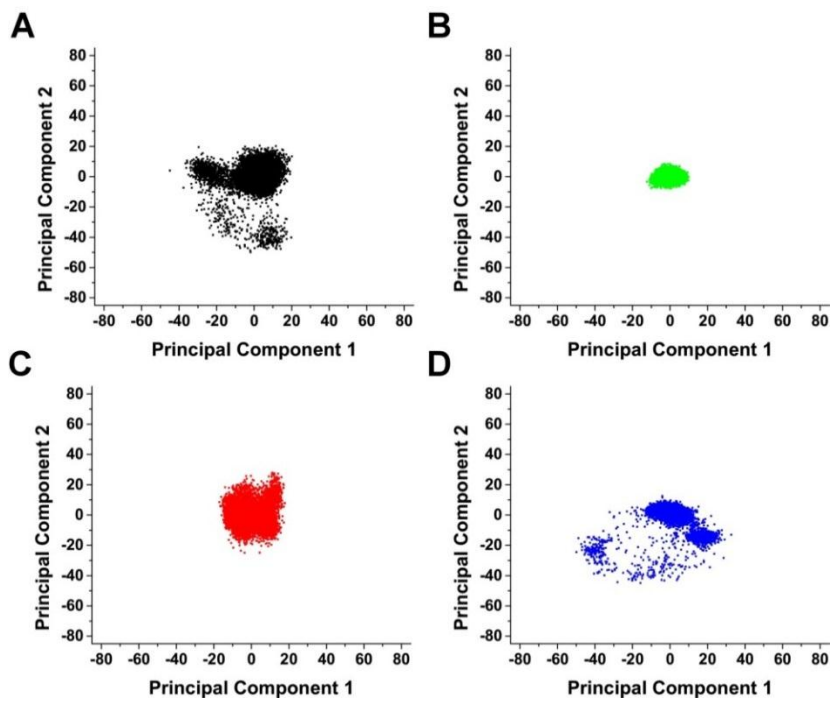

**Figure S26. The second principal component as a function of the first principal component for 2KKA-G MD trajectory.** Principal components are plotted for all non-hydrogen atoms (A), non-hydrogen G-tetrad stem atoms (B), non-hydrogen loop atoms (C), and non-hydrogen flanking bases atoms (D). For the 2KKA-G MD trajectory, dynamic motions of both loop and flanking atoms were observed to influence the overall dynamic motions of the G-quadruplex structures.

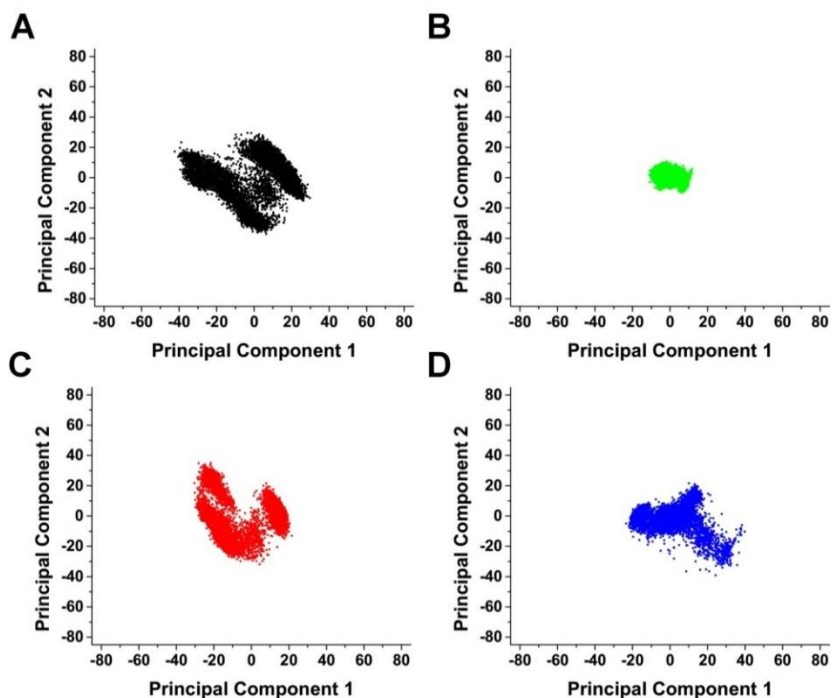

**Figure S27. The second principal component as a function of the first principal component for 2KKA-I MD trajectory.** Principal components are plotted for all non-hydrogen atoms (A), non-hydrogen G-tetrad stem atoms (B), non-hydrogen loop atoms (C), and non-hydrogen flanking bases atoms (D). For the 2KKA-I MD trajectory, dynamic motions of both loop and flanking atoms were observed to influence the overall dynamic motions of the G-quadruplex structures.

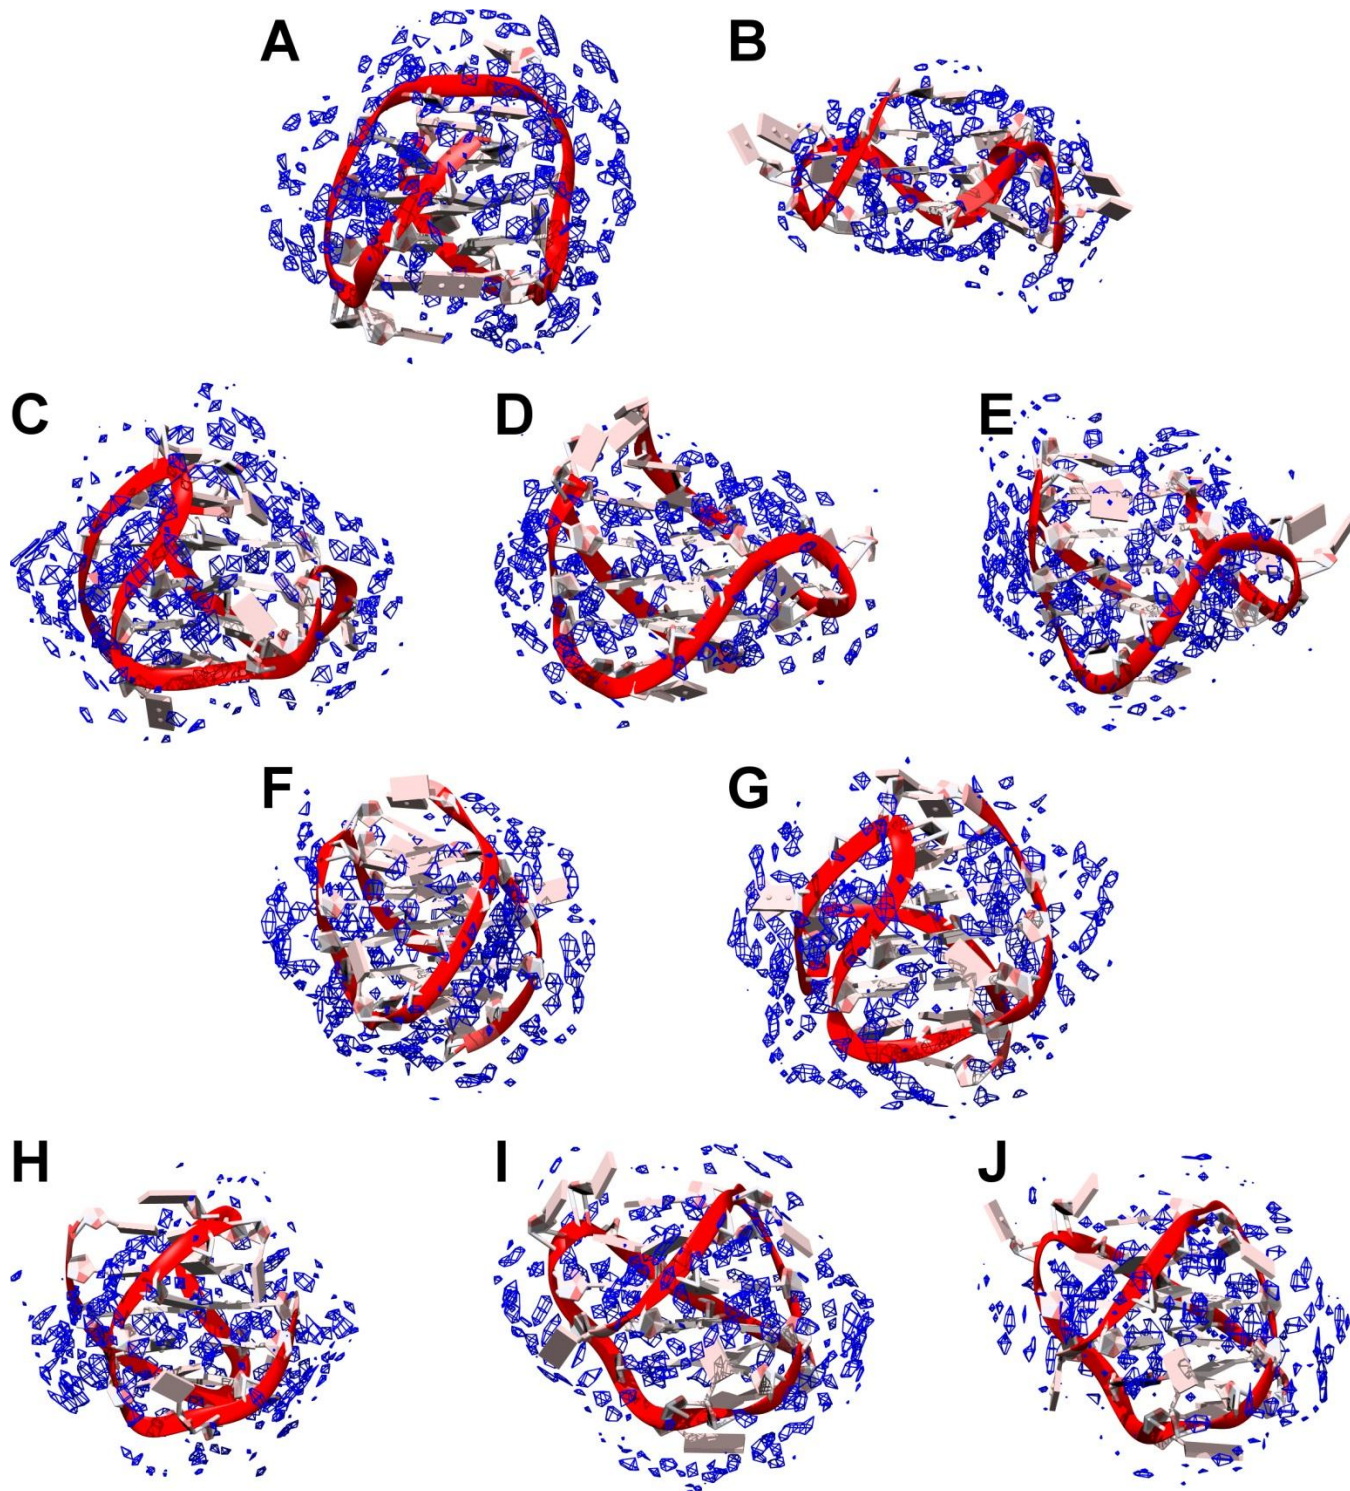

**Figure S28.** Pseudo-density grid maps of water oxygen atoms for 143D (A), 1KF1 (B), 2GKU (C), 2HY9 (D), 2JSM (E), 2JPZ (F), 2JSL (G), 2KF8 (H), 2KKA-G (I), and 2KKA-I (J). Water density (blue) was contoured at 2X the density (55.5 M) of bulk water. The average structure of each G-quadruplex over the trajectory is shown.

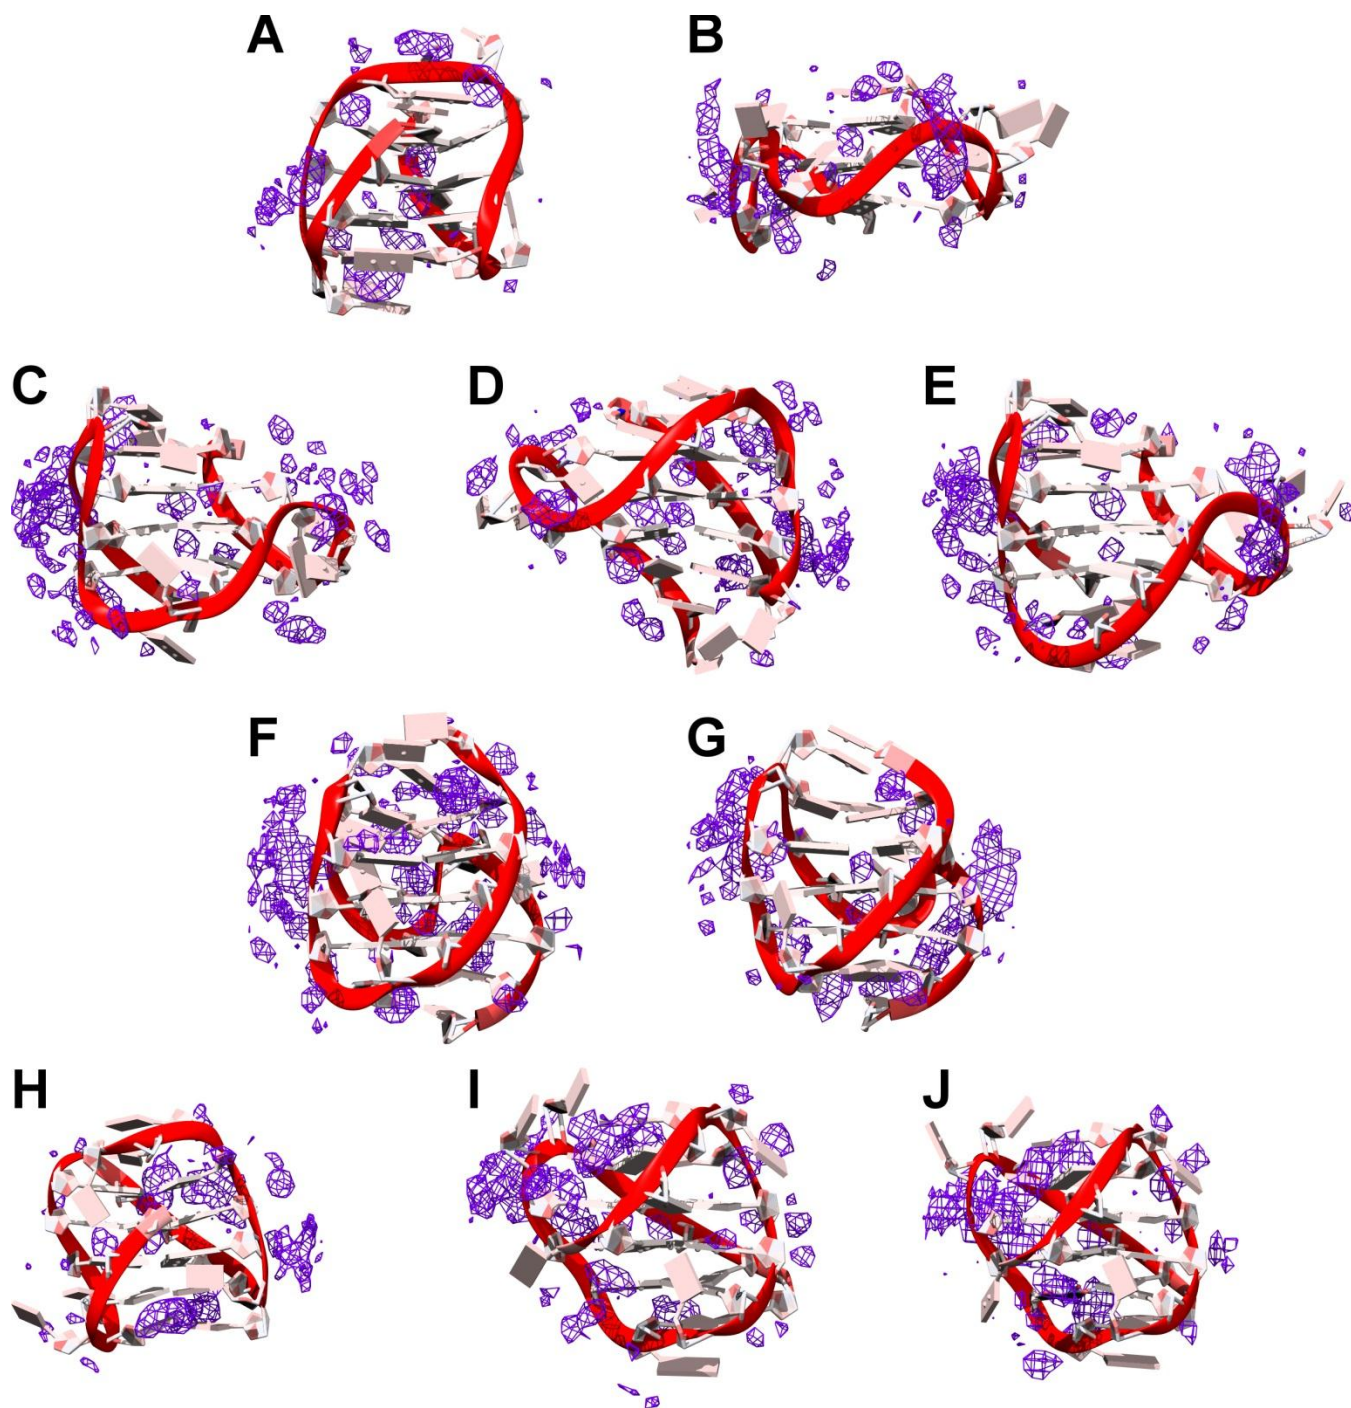

**Figure S29.** Pseudo-density grid maps of cations for 143D (A), 1KF1 (B), 2GKU (C), 2HY9 (D), 2JSM (E), 2JPZ (F), 2JSL (G), 2KF8 (H), 2KKA-G (I), and 2KKA-I (J). Cations density (purple) was contoured at the solubility density of sodium (6 M) for 143D and at the solubility density of potassium (4 M) for the other G-quadruplex structures. The average structure of each G-quadruplex over the trajectory is shown.
